# Supplementary material
Source: PubMed Central journal article supplement (PMC3908718)
Supplement: supp_kft243_toxsci_13_0355_File008.pdf [file supp_kft243_toxsci_13_0355_File008.pdf]

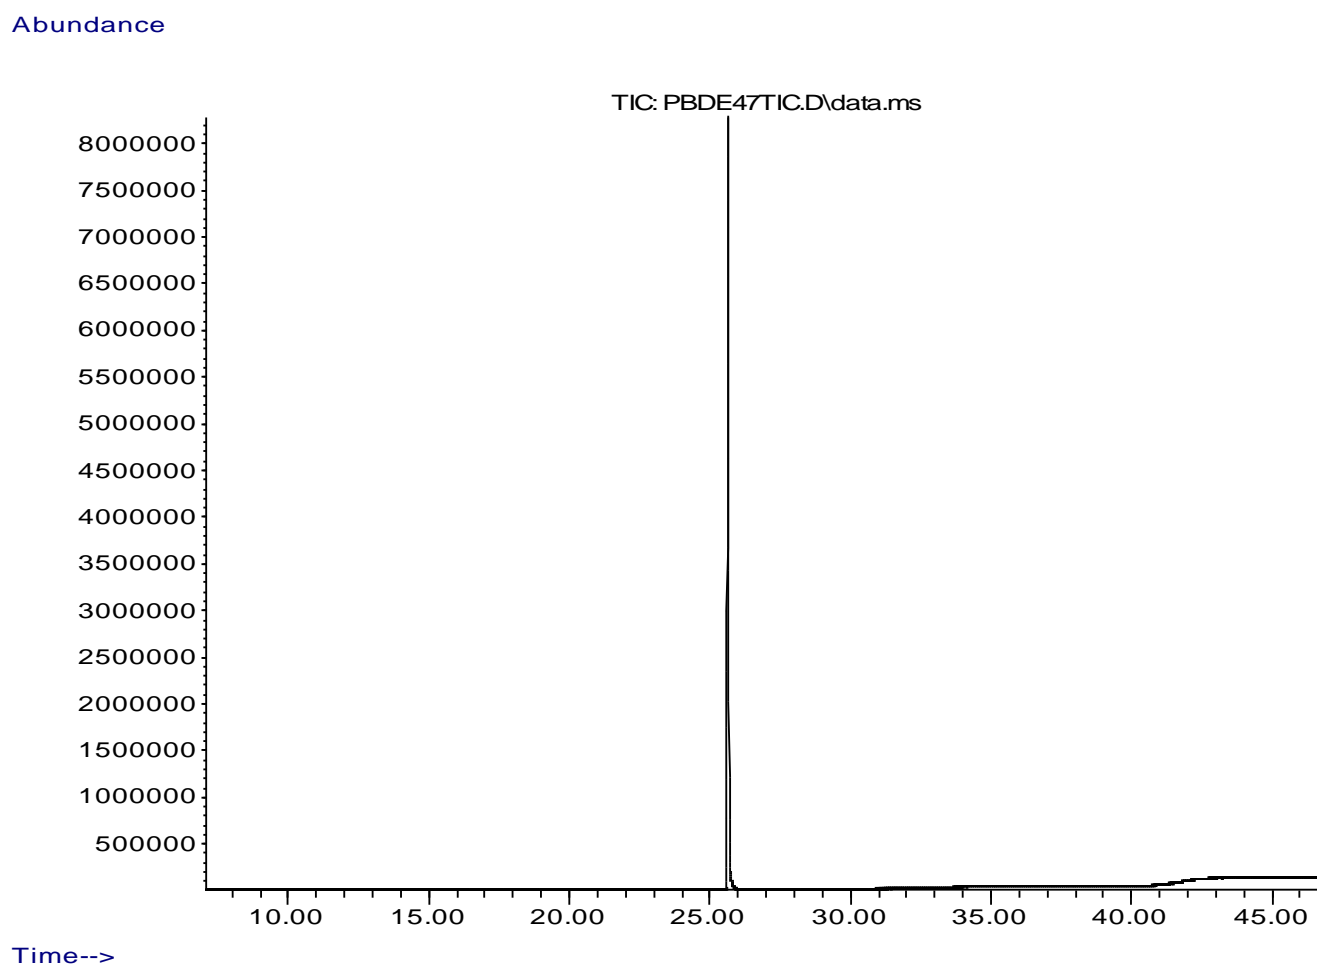

**Figure S1.** Gas chromatogram of BDE-47 showing only a single peak at 25.6 min corresponding to a tetrabrominated diphenylether (see mass spectrum in Figure S2). A solution of BDE-47 in isooctane was analyzed on an Agilent 7890A gas chromatograph with 5975C mass selective detector working in total ion scan mode. The analysis was performed on a HP-5 MS column (30 m  $\times$  0.32 mm I.D., 0.25  $\mu$ m film thickness; Agilent, Santa Clara, CA, USA) using the following temperature program: 80°C hold for 1 min, 10°C/min to 150°C, 5°C/min to 280°C, 10°C/min to 300°C hold for 6 min. The mass spectrometer source and quadrupole temperatures were 230°C and 150°C, respectively.

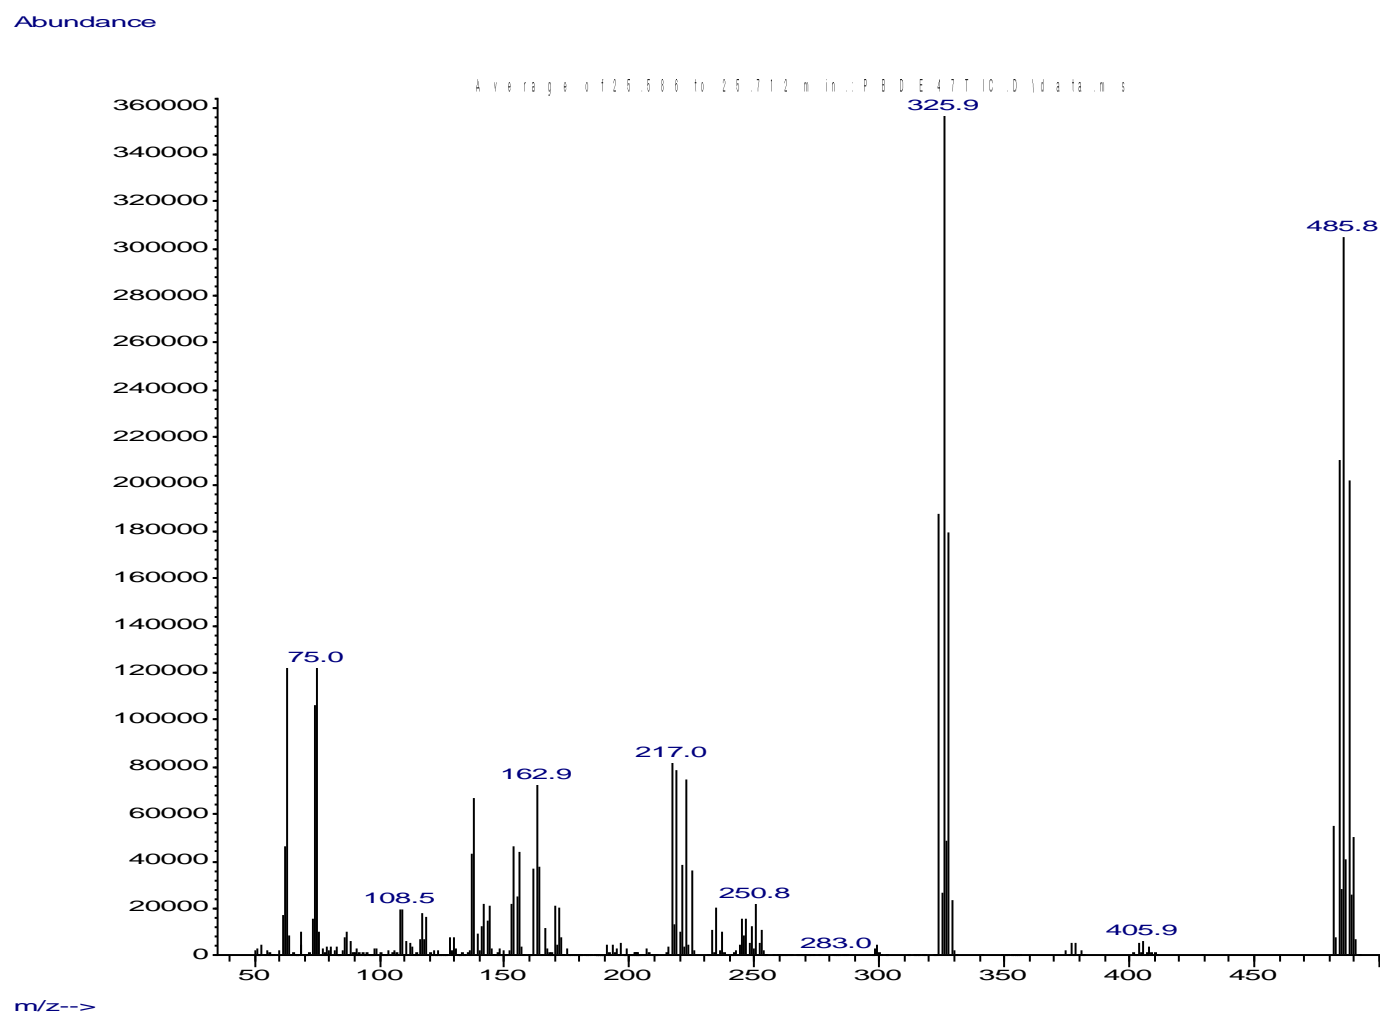

**Figure S2.** Mass spectrum of the peak at 25.6 min in the gas chromatogram in Figure S1. The  $m/z$  and isotopic distribution of the molecular ion are consistent with the theoretical  $m/z$  and isotopic distribution of BDE-47.

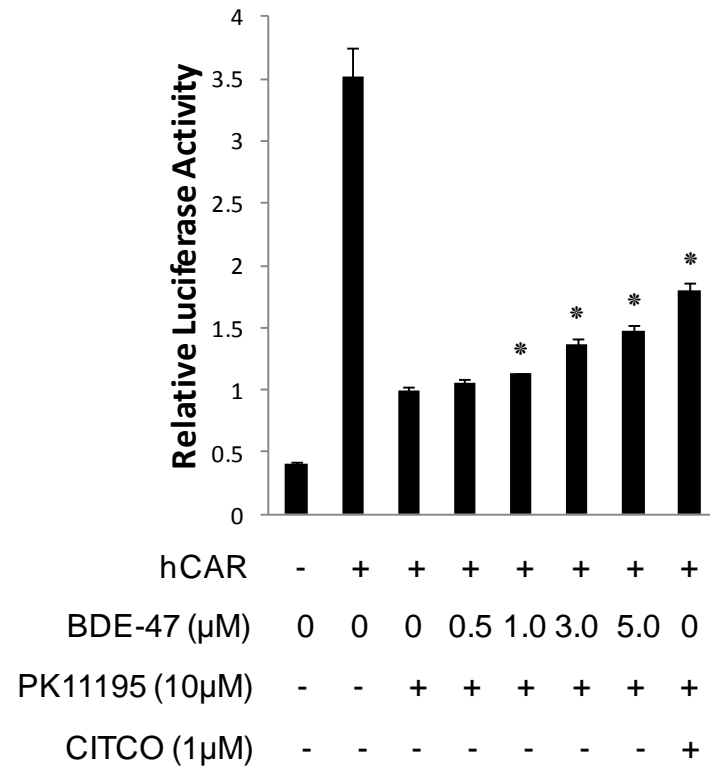

Figure S3. Activation of luciferase reporter gene by hCAR

NR1 x 5-luciferase reporter plasmid was co-transfected with hCAR expression vector into Huh-7 cells. 24 hrs after transfection, cells were treated with CITCO or the indicated concentrations of BDE-47 for another 24 hrs. Luciferase activities were determined as described in the methods section. The relative luciferase activities were calculated by considering antagonists (PK11195 for hCAR) treated cells with CAR transfection as one. Numbers represent mean  $\pm$  S. D. (n=3). \*\* p<0.05.
